# Supplementary material
Source: PubMed Central journal article supplement (PMC6625351)
Supplement: NIHMS1528784-supplement-1.pdf [file NIHMS1528784-supplement-1.pdf]

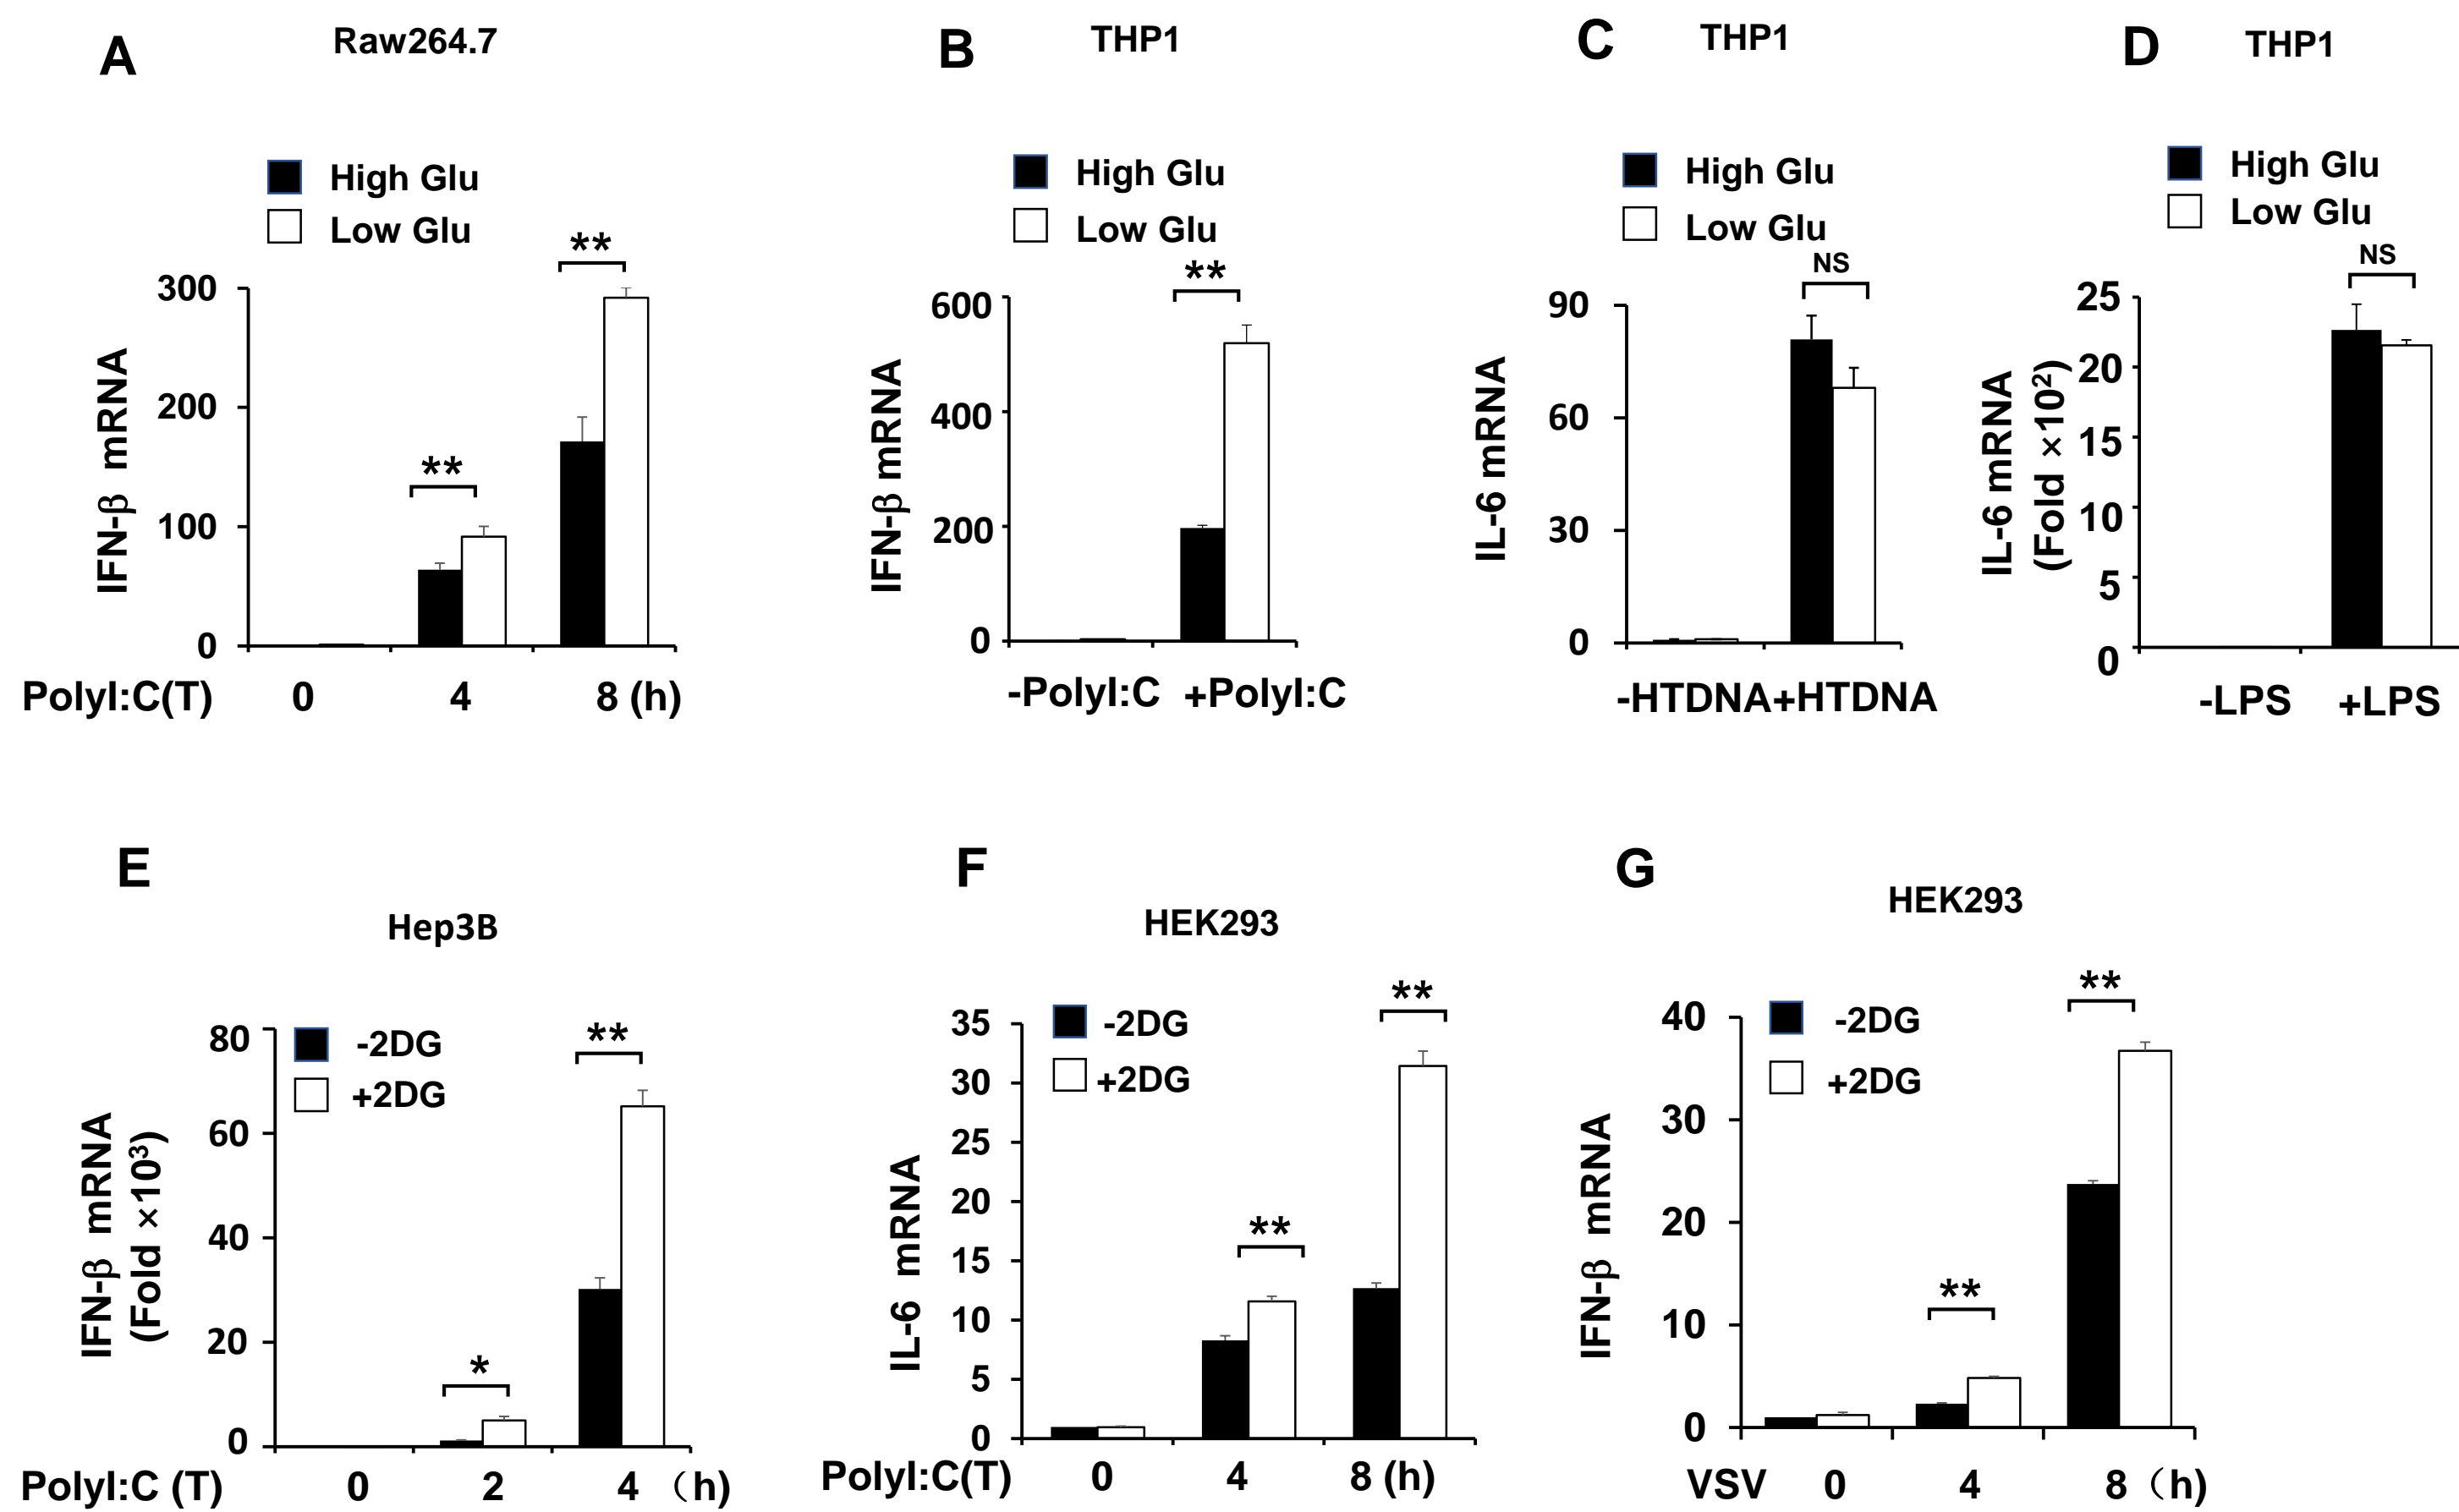

Figure S1. Inhibition of glucose metabolism promotes RLR induced type-I interferon production, Related to Figure 1.
