# Supplementary material
Source: PubMed Central journal article supplement (PMC6625351)
Supplement: NIHMS1528784-supplement-3.pdf [file NIHMS1528784-supplement-3.pdf]

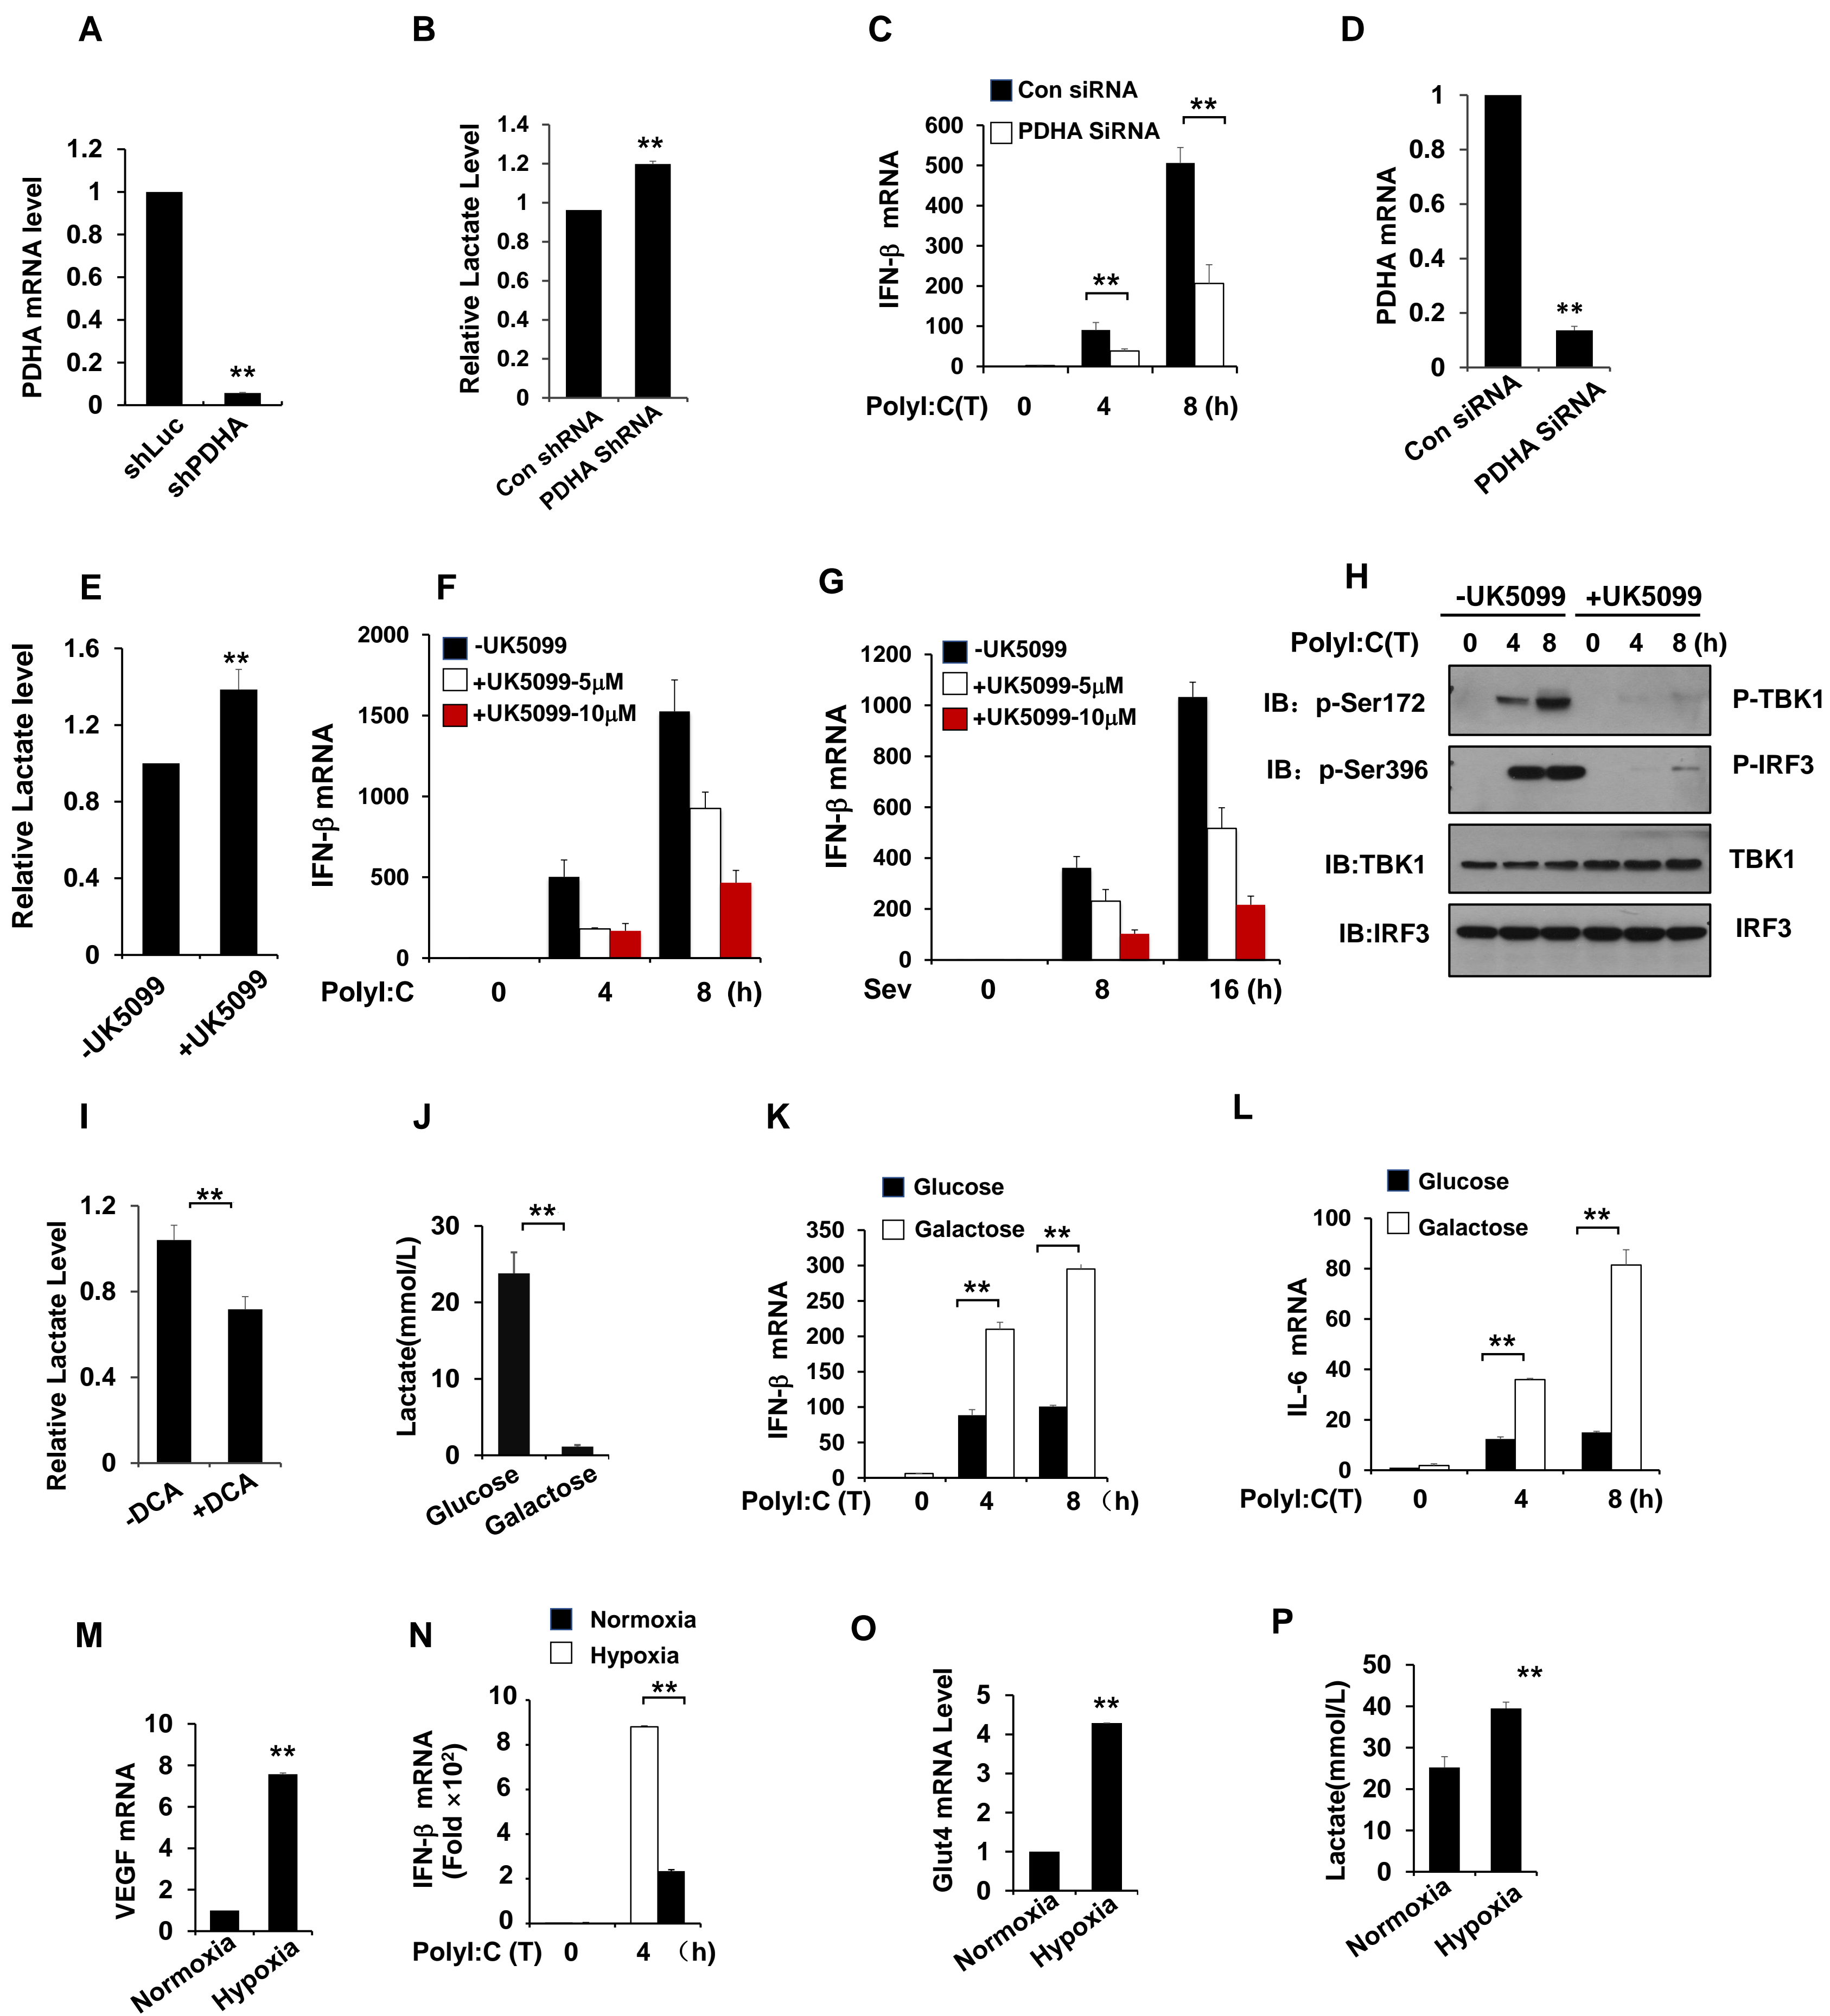

Figure S3. Anaerobic glycolysis affects RLR triggered type-1 interferon production, Related to Figure 3.
