# Supplementary material
Source: PubMed Central journal article supplement (PMC6625351)
Supplement: NIHMS1528784-supplement-5.pdf [file NIHMS1528784-supplement-5.pdf]

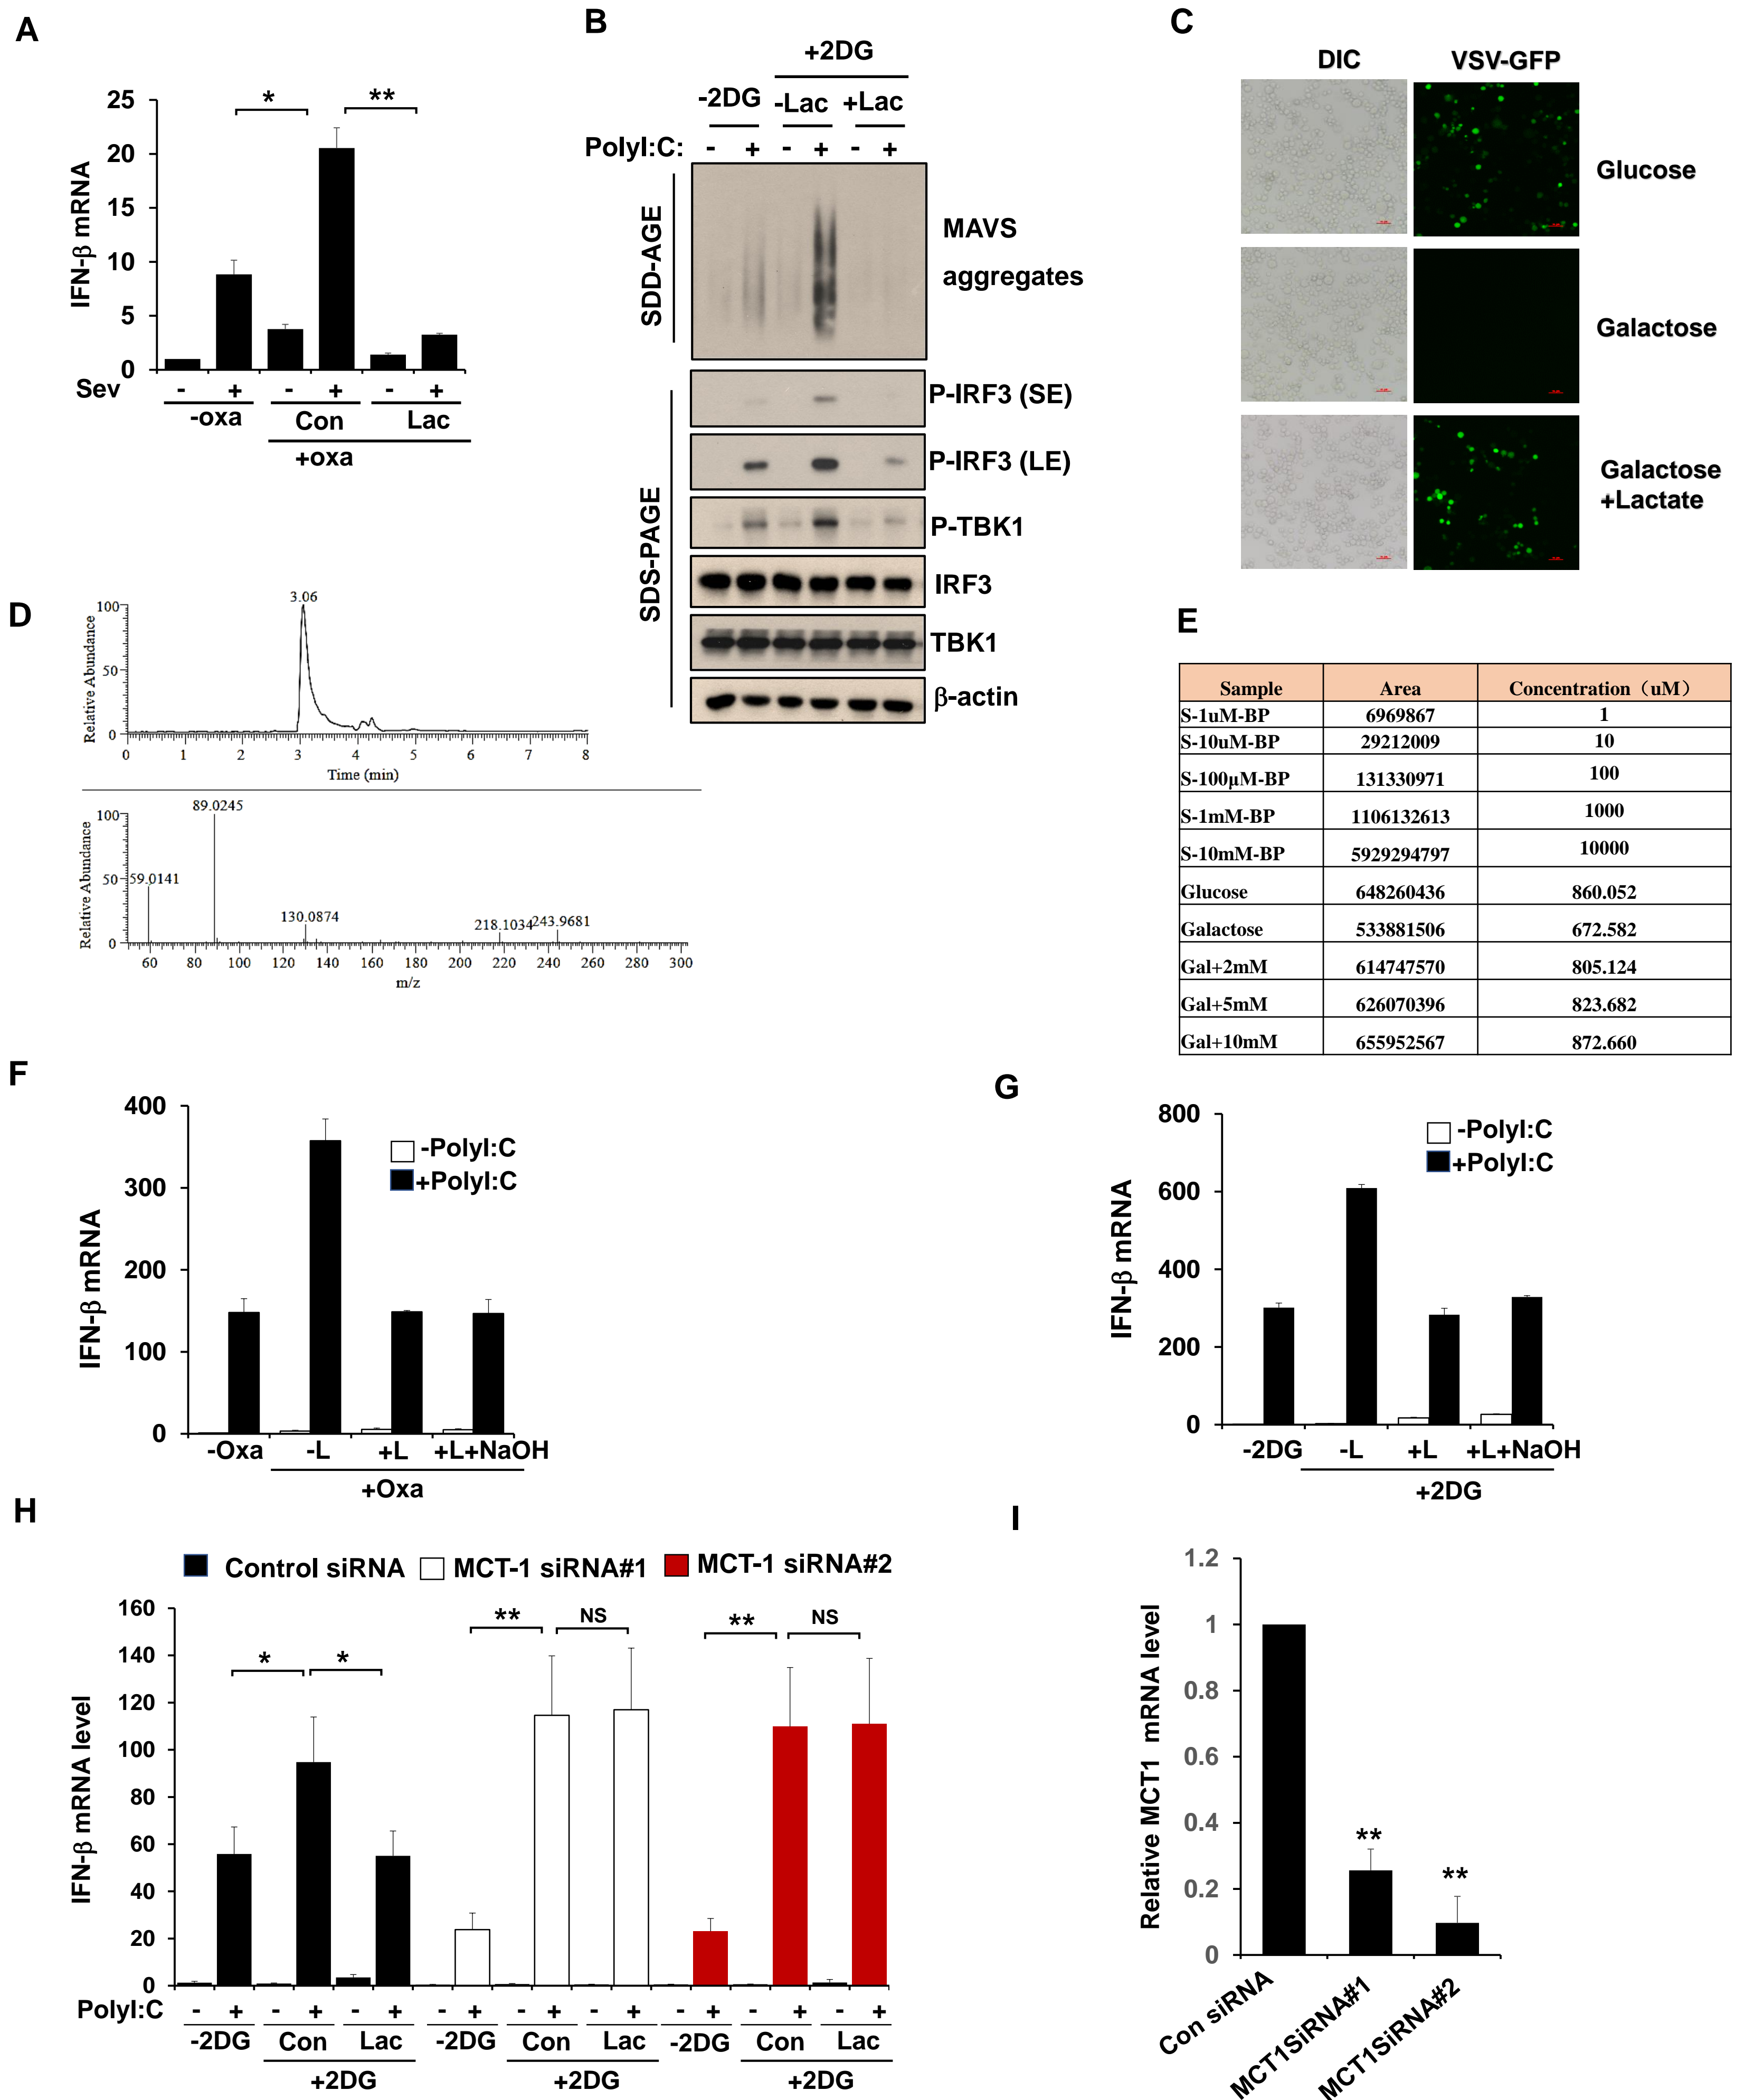

Figure S5. LDHA associated lactate inhibits RLR induced type-I interferon production, Related to Figure 4.
