# Supplementary material
Source: PubMed Central journal article supplement (PMC6625351)
Supplement: NIHMS1528784-supplement-7.pdf [file NIHMS1528784-supplement-7.pdf]

### A Peptides of MAVS identified by Mass-pec

|                                 |
|---------------------------------|
| LPGPTGSVVSTGTSFSSSSPGLASAGAAEGK |
| GPVSPSVSFQPLAR                  |
| DTLWHLFNTLQR                    |
| RPGWVEYFIALR                    |
| LPTSSKPPGAVPSNALTNPAPSK         |
| VPTSMVLTK                       |
| QGAESDQAEPIICSSGAEAPANSLPSK     |
| LPINSTR                         |
| VPANPASVSTVPSK                  |

### B

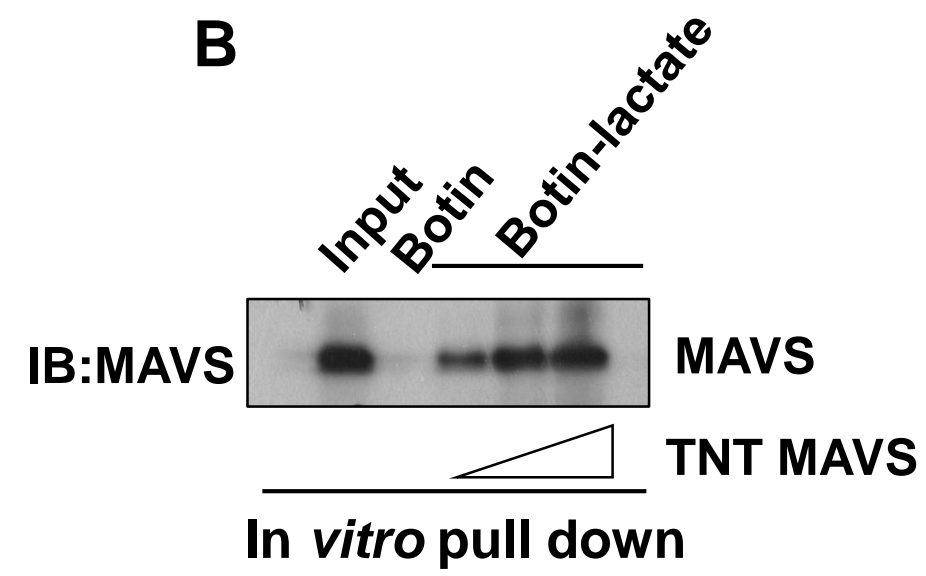

### C

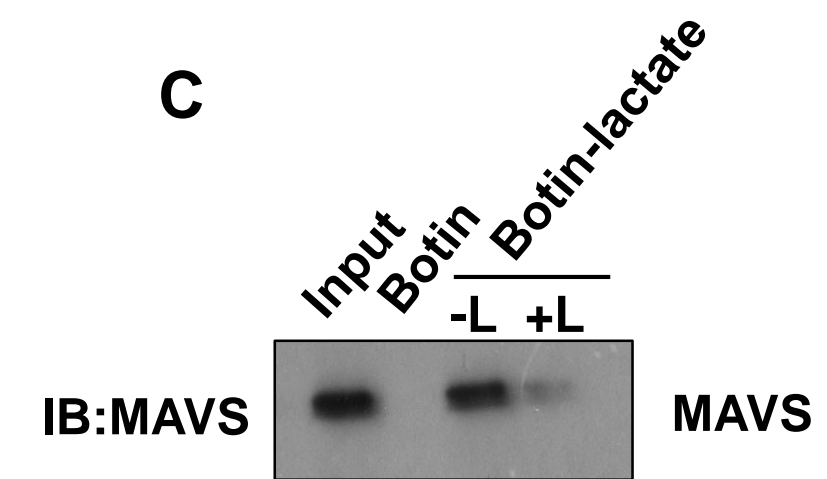

### D

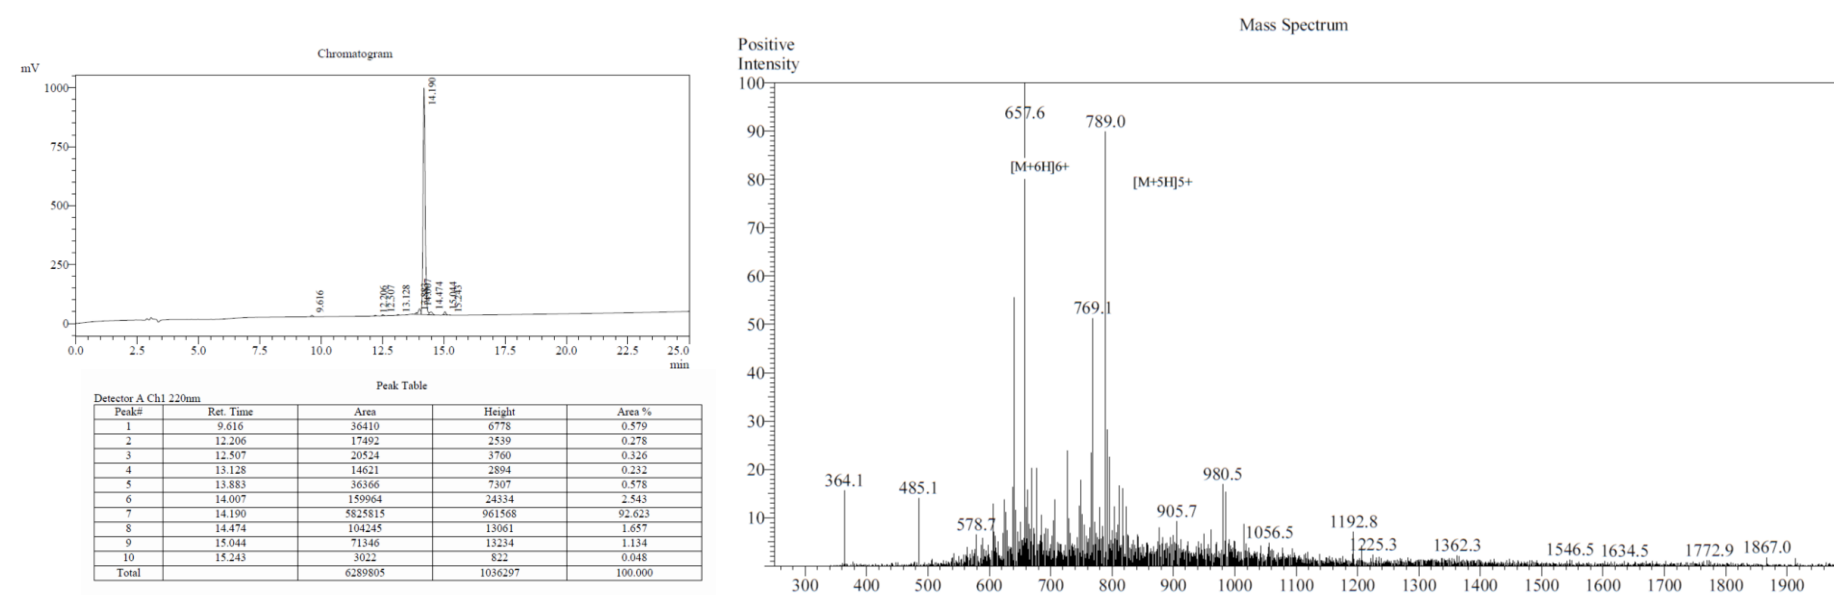

### E

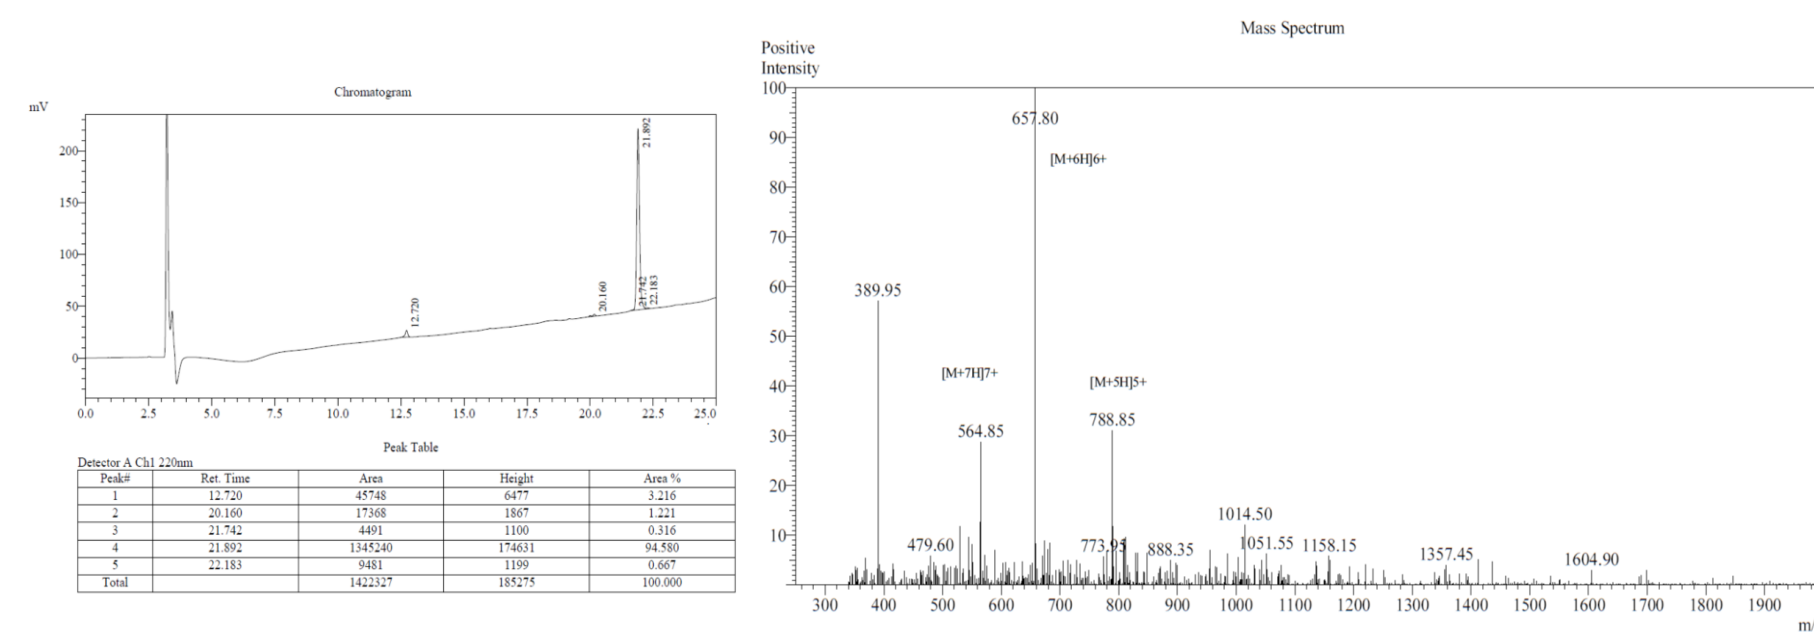

### F

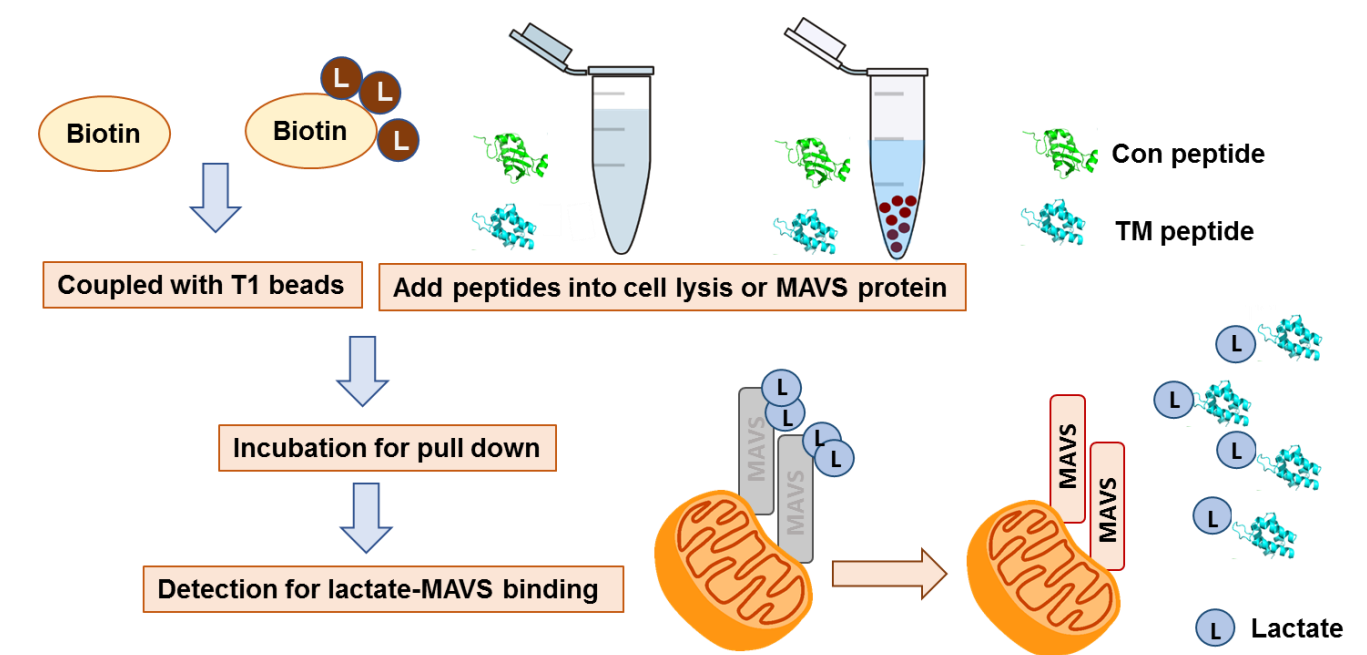

### G

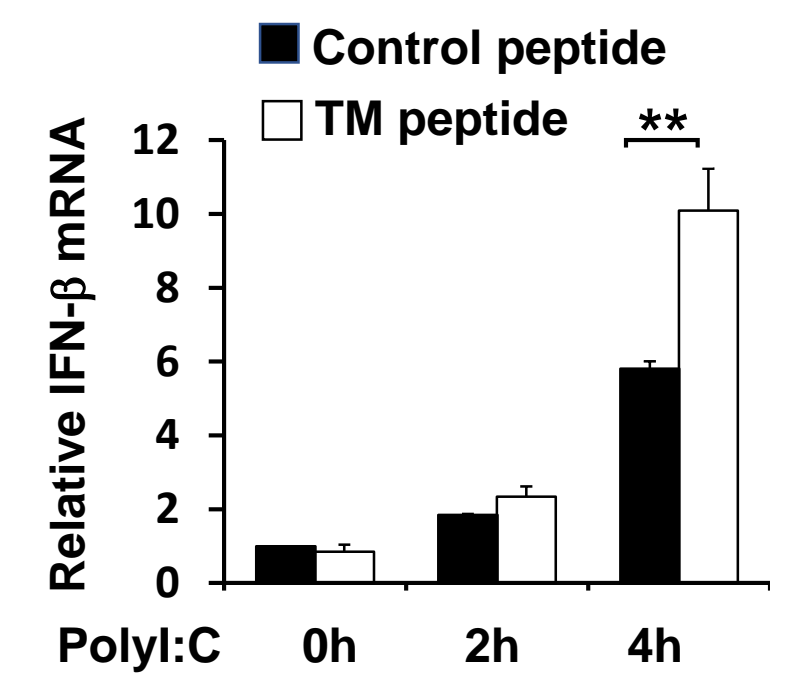

### H

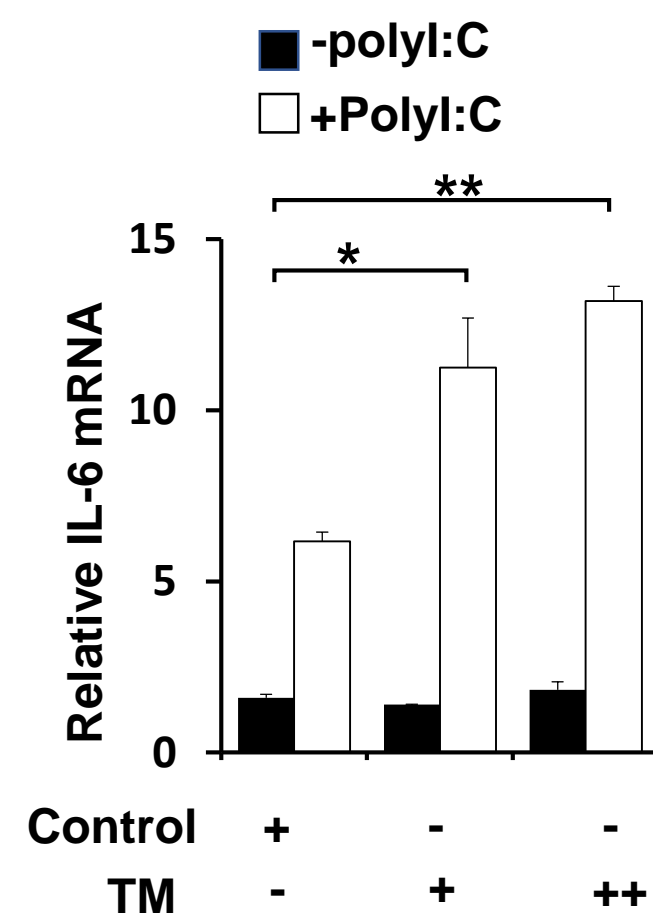

### I

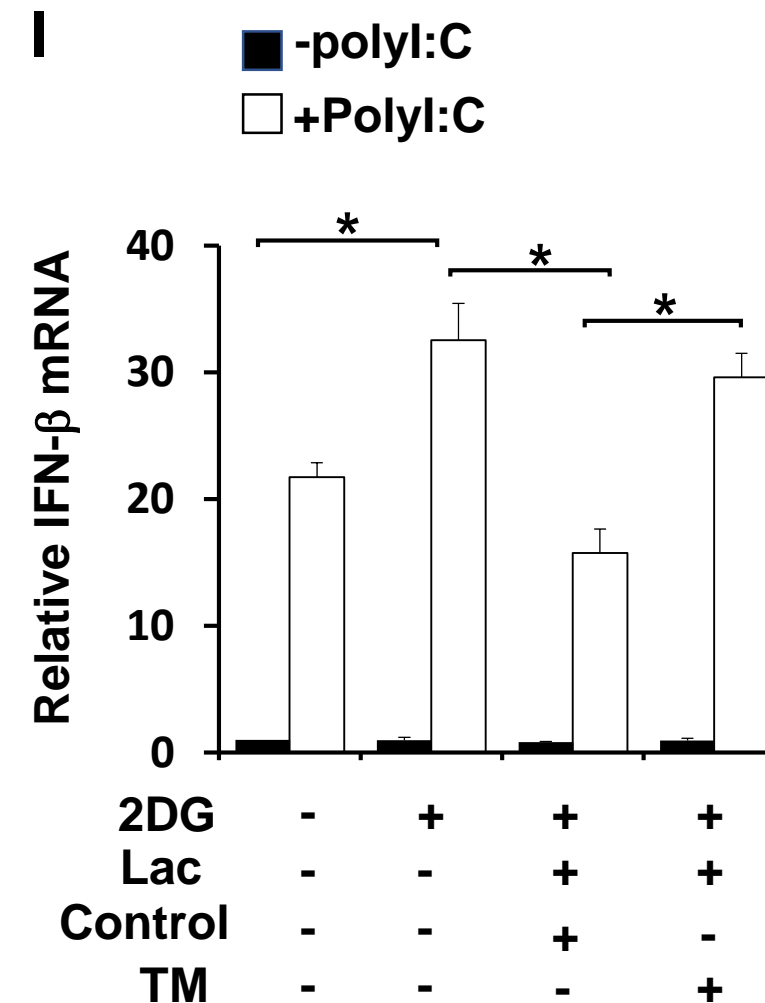

### J

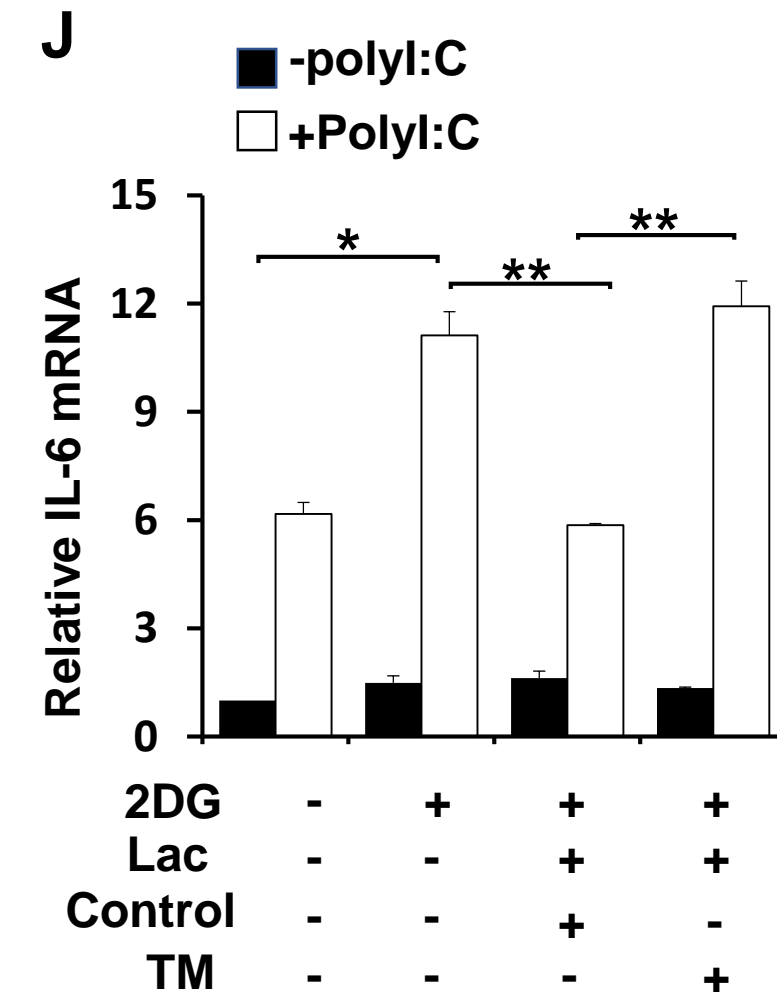

Figure S7. Lactate negatively regulates RLR activation by targeting MAVS, Related to Figure 6.
