# Supplementary material
Source: PubMed Central journal article supplement (PMC6625351)
Supplement: NIHMS1528784-supplement-8.pdf [file NIHMS1528784-supplement-8.pdf]

|                                             |                                  |
|---------------------------------------------|----------------------------------|
| <b>Human IFN<math>\beta</math>-qPCR-F</b>   | <b>TCCAAATTGCTCTCCTGTTG</b>      |
| <b>Human IFN<math>\beta</math>-qPCR-R</b>   | <b>GCAGTATTCAAGCCTCCCAT</b>      |
| <b>Mouse IFN<math>\beta</math>-qPCR-F</b>   | <b>TCCGAGCAGAGATCTTCAGGAA</b>    |
| <b>Mouse IFN<math>\beta</math>-qPCR-R</b>   | <b>TGCAACCACCACTCATTCTGAG</b>    |
| <b>Human IL-6-qPCR-F</b>                    | <b>TGCAGAAAAAGGCAAAGAATCTAG</b>  |
| <b>Human IL-6-qPCR-R</b>                    | <b>CGTCAGCAGGCTGGCATT</b>        |
| <b>Mouse IL-6-qPCR-F</b>                    | <b>AGTTGCCTTCTTGGGACTGATG</b>    |
| <b>Mouse IL-6-qPCR-R</b>                    | <b>GGGAGTGGTATCCTCTGTGAAGTCT</b> |
| <b>Mouse IFN<math>\alpha</math>-qPCR-F</b>  | <b>CCTGAACATCTTCACATCAAAGGA</b>  |
| <b>Mouse IFN<math>\alpha</math> -qPCR-R</b> | <b>AGCTGCTGGTGGAGGTCATT</b>      |
| <b>Human GAPDH-qPCR-F</b>                   | <b>GAGTCAACGGATTTGGTCGT</b>      |
| <b>Human GAPDH-qPCR-R</b>                   | <b>TTGATTTTGGAGGGATCTCG</b>      |
| <b>Mouse HPRT-qPCR-F</b>                    | <b>CAGTCCCAGCGTCGTGATTAG</b>     |
| <b>Mouse HPRT-qPCR-R</b>                    | <b>AAACACTTTTTCCAAATCCTCGG</b>   |
| <b>Sev-qPCR-F</b>                           | <b>GCTGCCGACAAGGTGAGAGC</b>      |
| <b>Sev-qPCR-R</b>                           | <b>GCCCGCCATGCCTCTCTCTA</b>      |
| <b>VSV-qPCR-F</b>                           | <b>ACGGCGTACTTCCAGATGG</b>       |
| <b>VSV-qPCR-R</b>                           | <b>CTCGGTTCAAGATCCAGGT</b>       |

**Supplemental Table 1. Oligonucleotides used. Related to Key Resource Table.**
