# Supplementary material
Source: PubMed Central journal article supplement (PMC6625351)

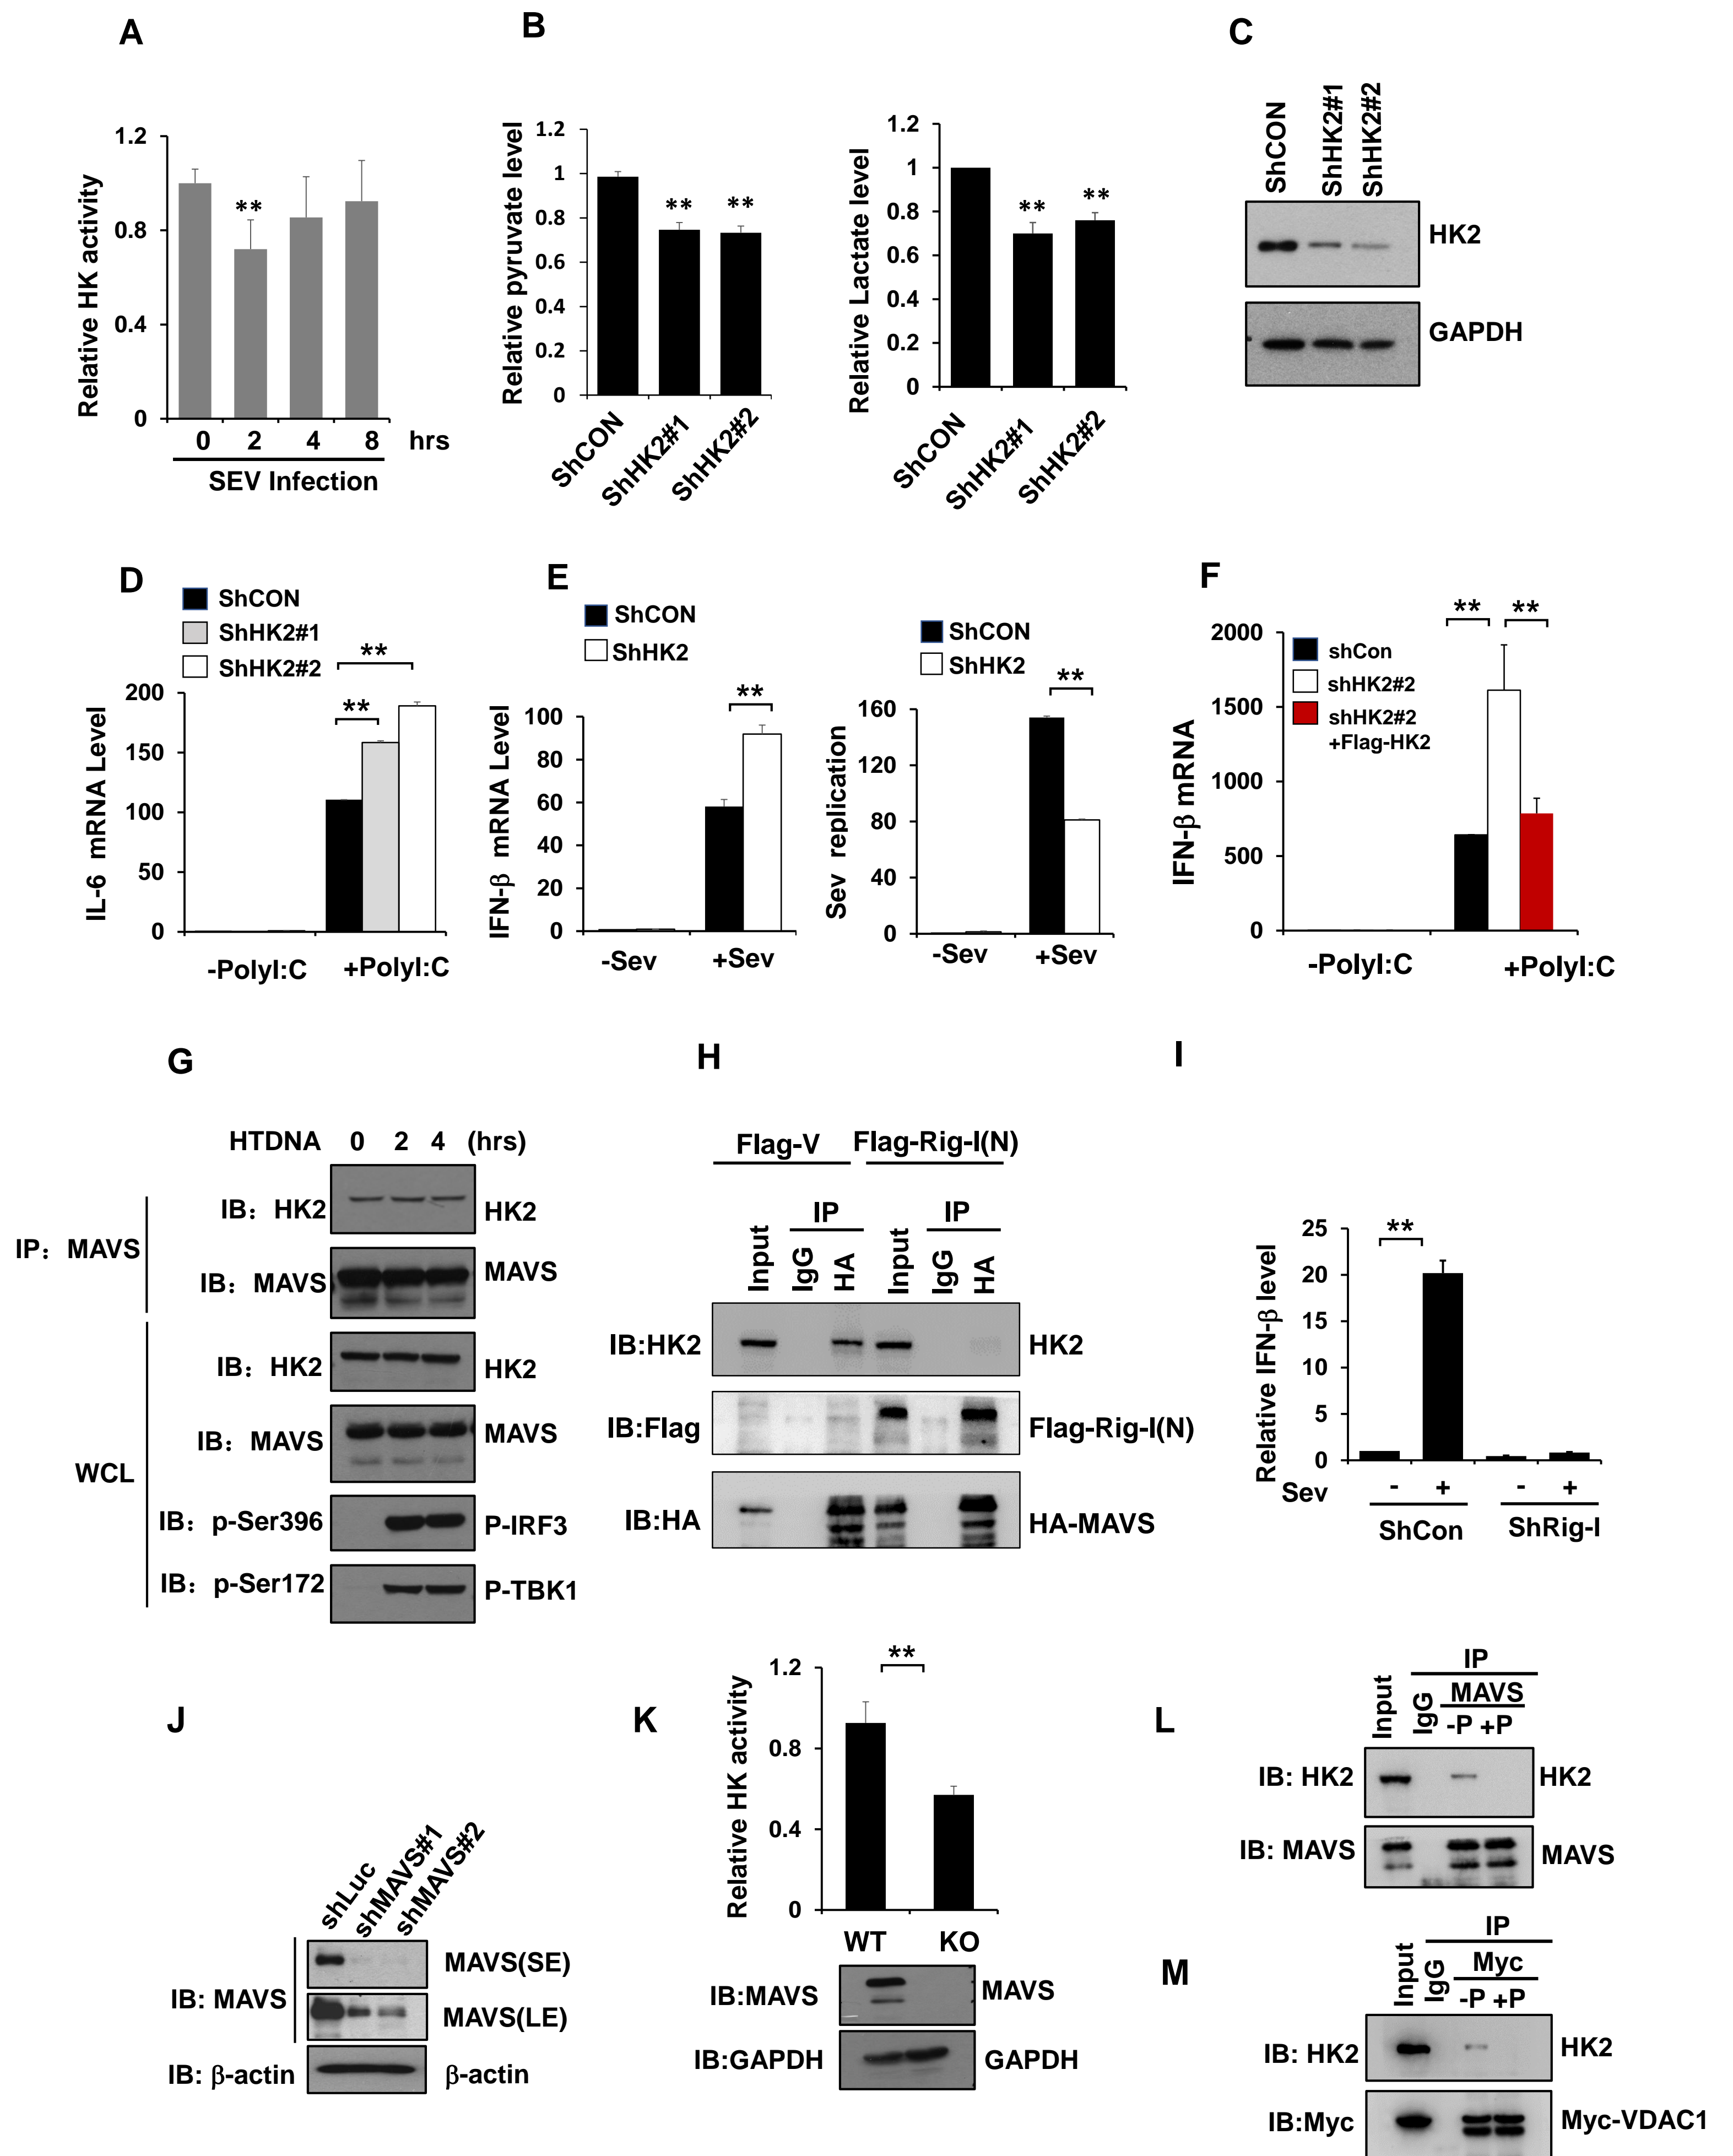

Figure S2. Reciprocal regulation between hexokinase and MAVS , Related to Figure 2.

Supplement: NIHMS1528784-supplement-2.pdf [file NIHMS1528784-supplement-2.pdf]

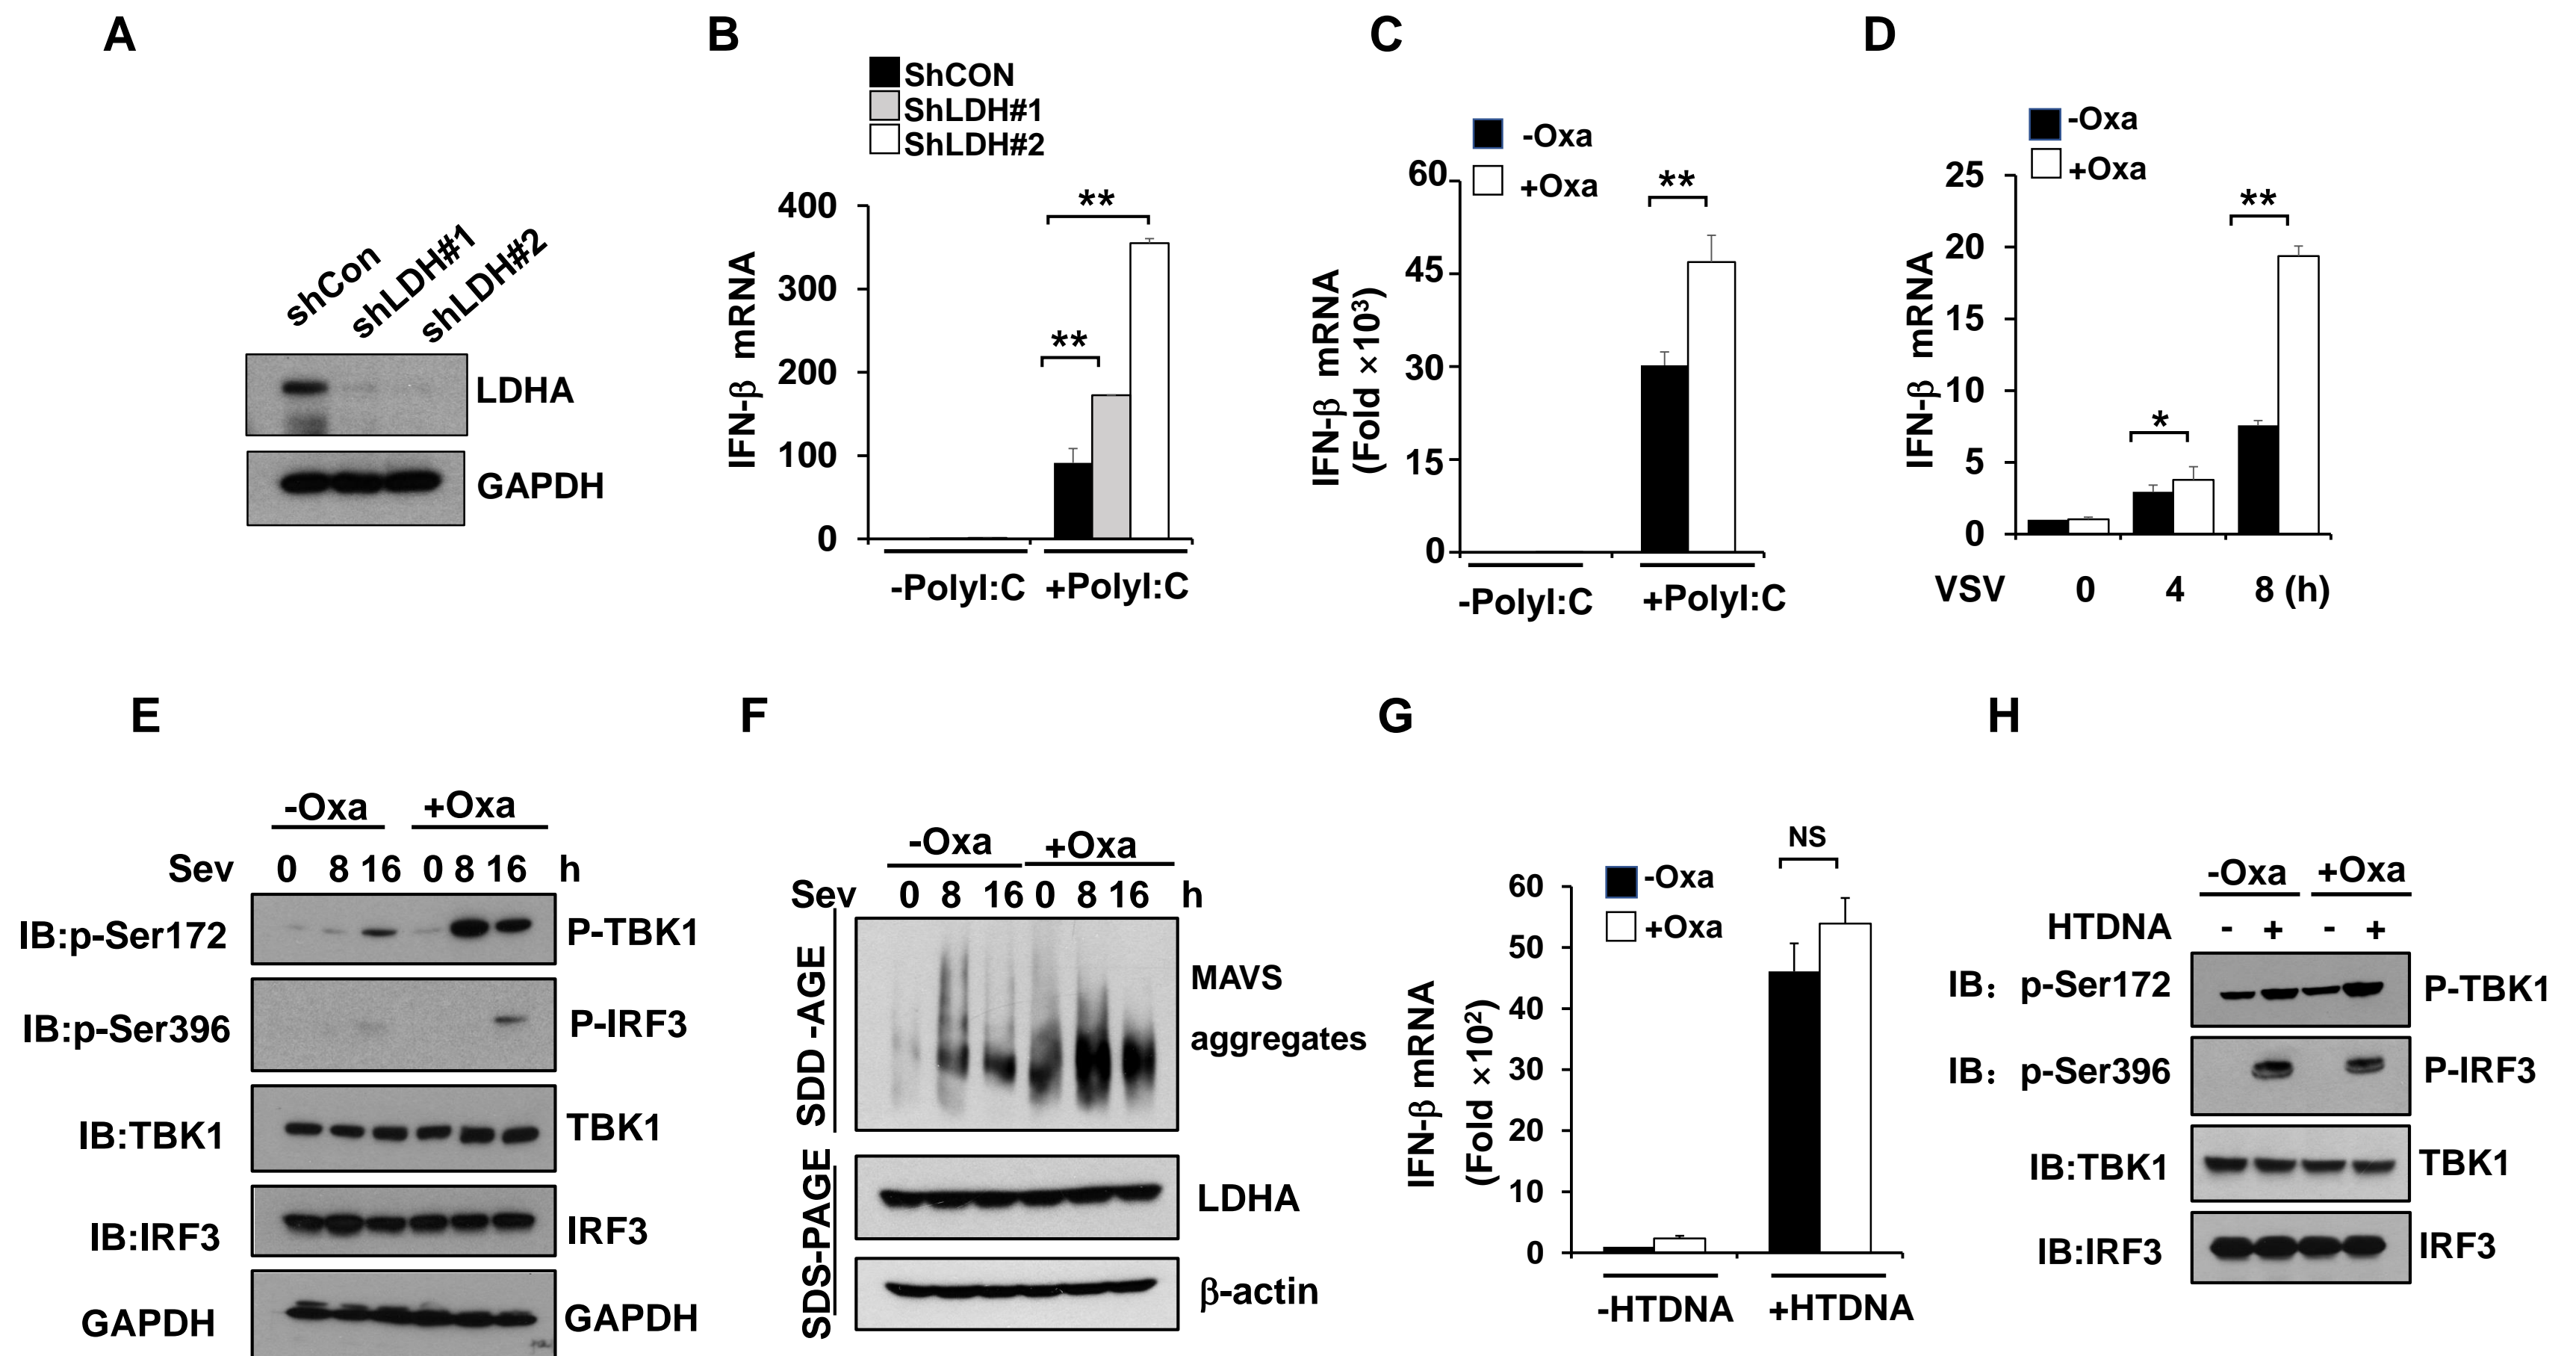

Figure S4. LDHA inhibits RLR induced type-I interferon production, Related to Figure 4.

Supplement: NIHMS1528784-supplement-4.pdf [file NIHMS1528784-supplement-4.pdf]

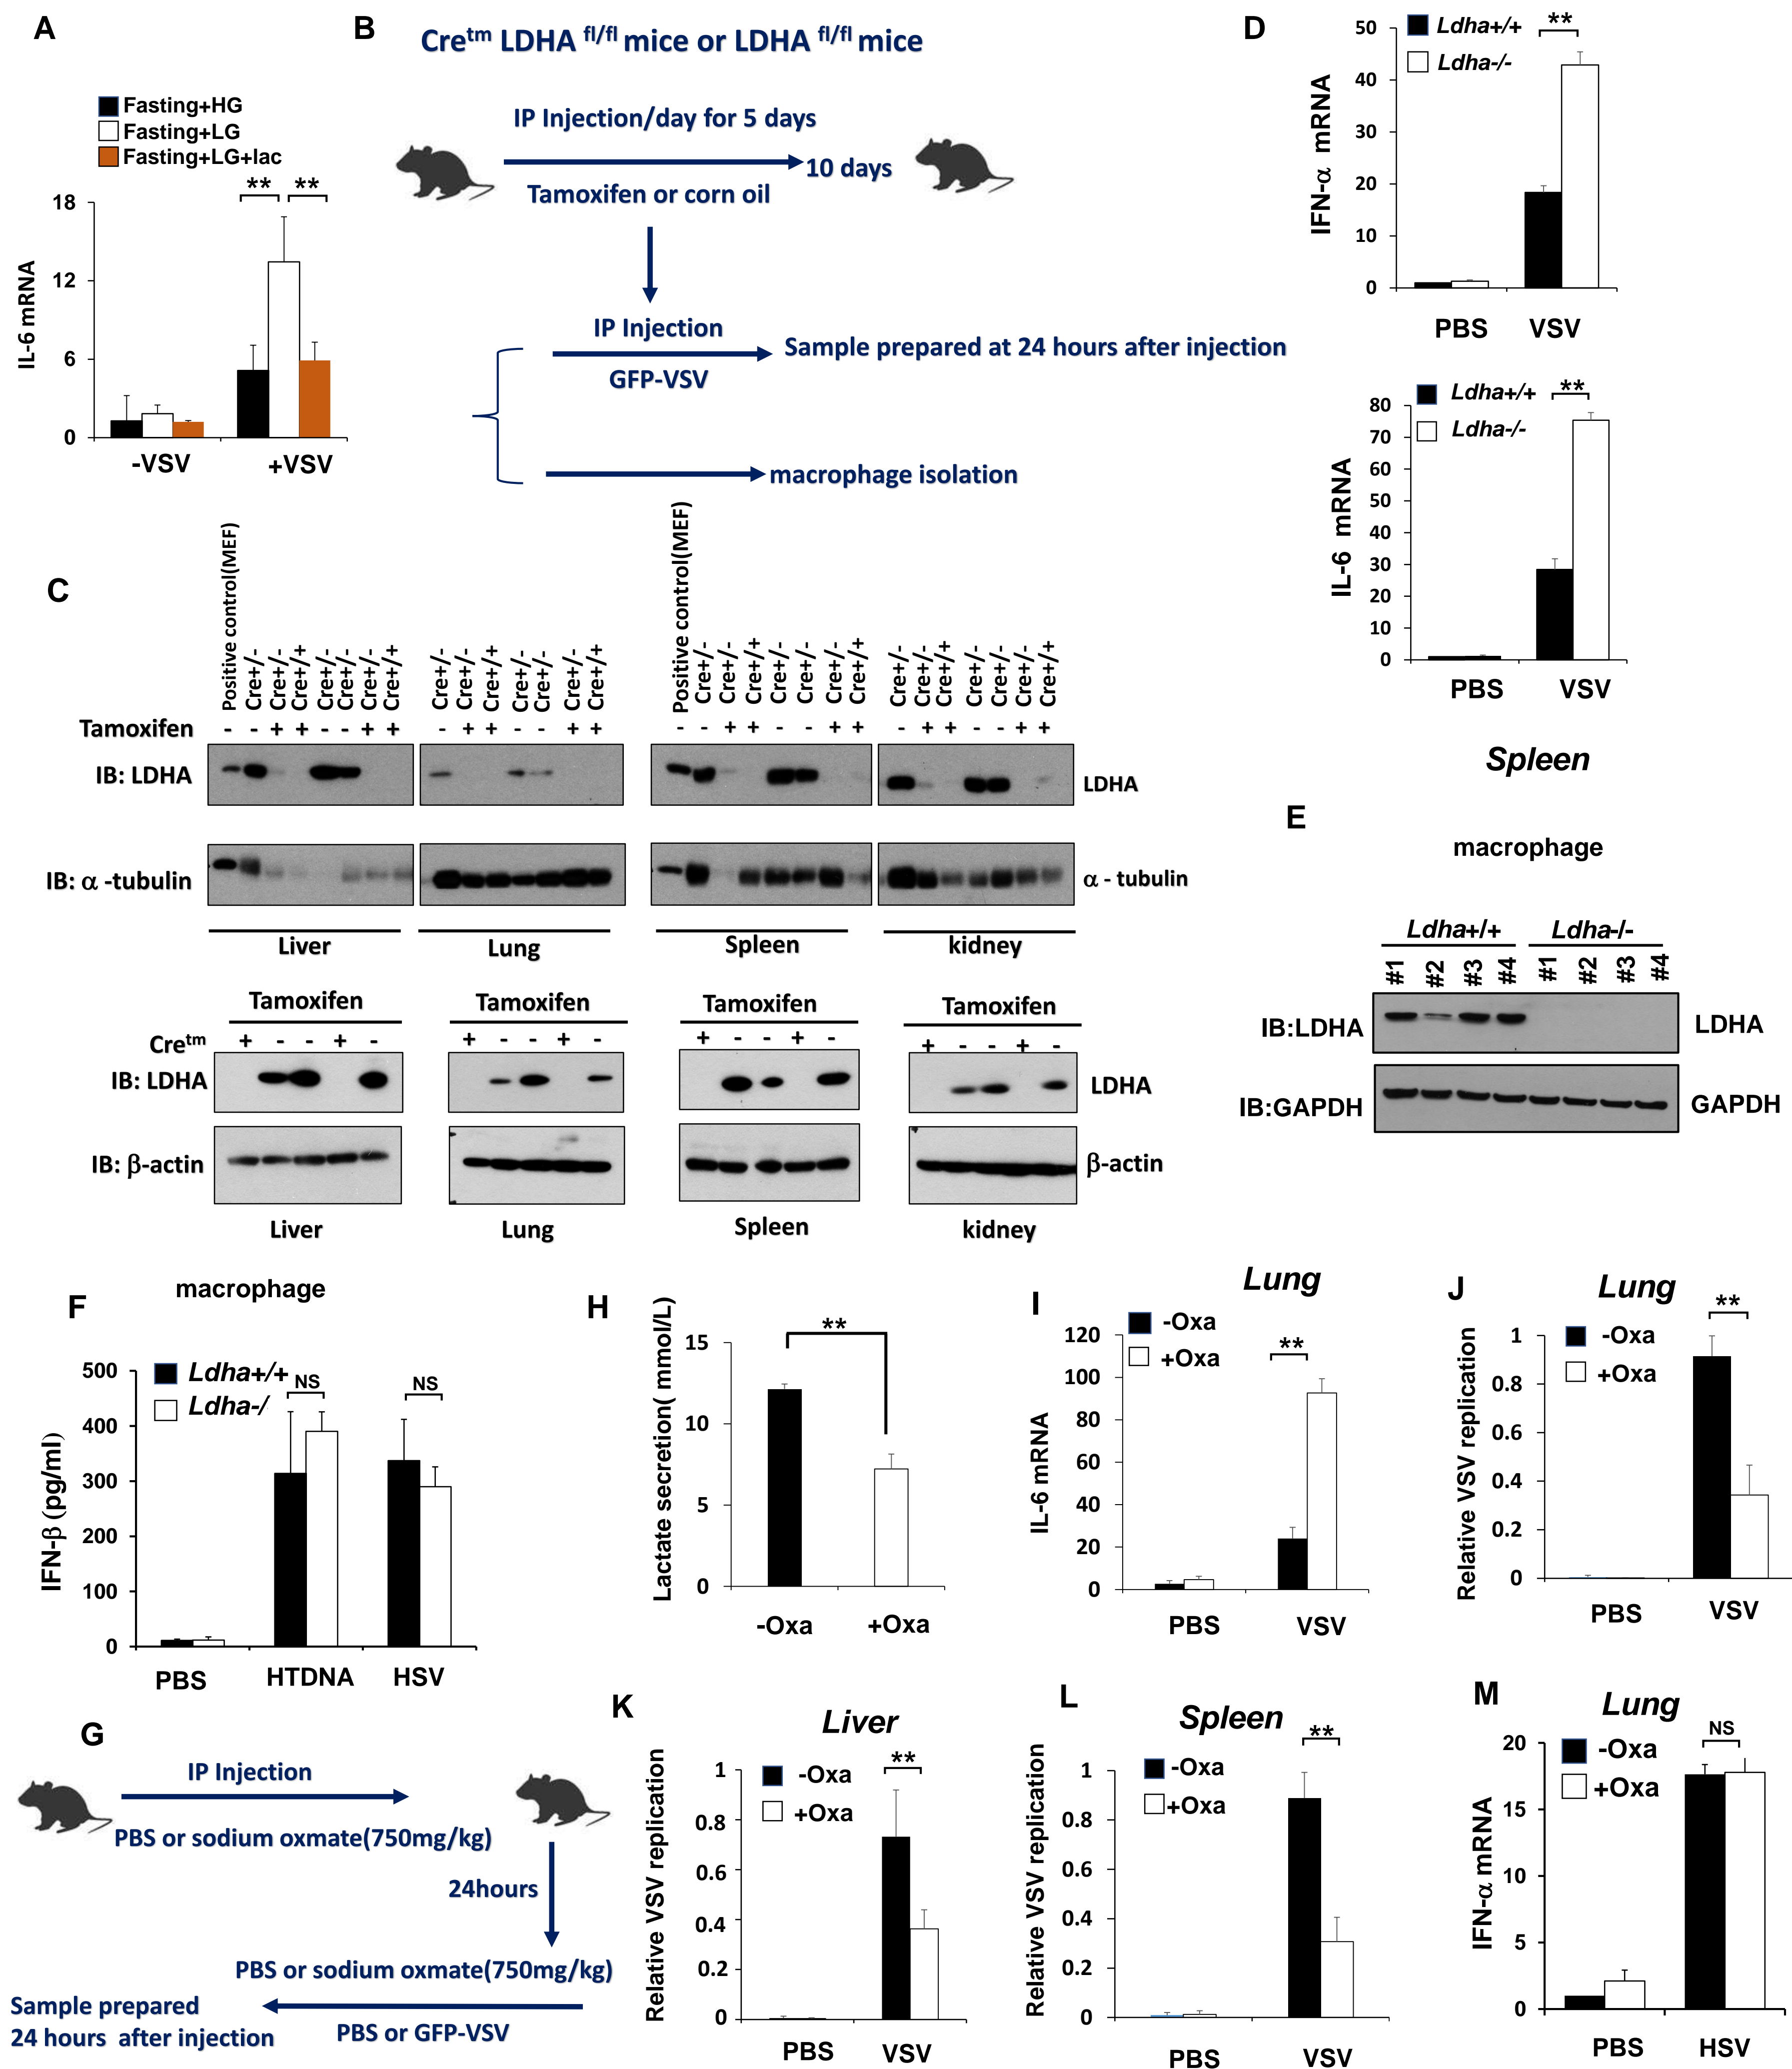

Figure S6. *In vivo* targeting LDHA enhances RLR signaling, Related to Figure 5.

Supplement: NIHMS1528784-supplement-6.pdf [file NIHMS1528784-supplement-6.pdf]
